# Supplementary material for: Plaque assay for canine coronavirus in CRFK cells.
Source: Royal Society of Chemistry journal article supplement (doi:10.1039/b508655h), 1987-01-01
Supplement: b508655h.pdf [file b508655h.pdf]

## Supplementary information

### Rapid energy transfer in bichromophoric tris-bipyridyl/cyclometallated ruthenium(II) complexes

Sascha Ott,<sup>a,b</sup> Magnus Borgström,<sup>a</sup> Leif Hammarström,<sup>\*a</sup> and Olof Johansson<sup>\*a,b</sup>

<sup>a</sup> Department of Physical Chemistry, Uppsala University, P.O. Box 579, 751 23 Uppsala, Sweden. Fax: +46 18 4713654; Tel: +46 18 4713632.

E-mail: [olof.johansson@fki.uu.se](mailto:olof.johansson@fki.uu.se)

<sup>b</sup> Department of Chemistry, Organic Chemistry, Uppsala University, P.O. Box 599, 751 24 Uppsala, Sweden.

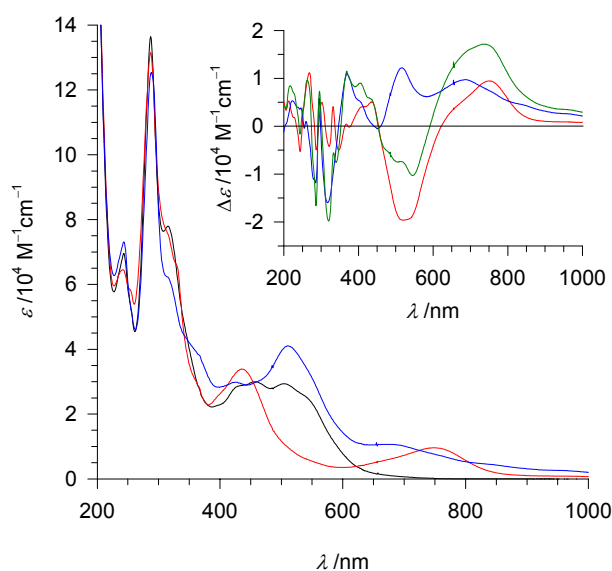

Spectroelectrochemical measurements of  $[(\text{bpy})_2\text{Ru}(\text{II})\text{Ru}(\text{tpy})][\text{PF}_6]_3$  (—) in  $\text{CH}_3\text{CN}$  (0.1 M  $\text{TBAPF}_6$ ). The spectra were recorded at +0.32 V (—) and at -1.75 V (—), vs  $\text{Fc}^{+/0}$ . Inset shows the corresponding difference spectra. The green spectrum is a sum of the oxidized and the reduced spectra, which is different from the state observed after  $\sim 1$  ps in the transient absorption measurements.
